# Supplementary material for: The Impact of Circadian Rhythms on Reperfusion Therapy Efficacy in Acute Ischemic Stroke: A retrospective cohort study
Source: Research Square preprint supplement (doi:10.21203/rs.3.rs-7640381/v1), 2025-11-01
Supplement: Supplementary file 1 [file 9824dde008cd92dc66abed5a.docx]

**Supplement**

**Figure S1.** Distribution of standardized mean difference of variables before and after adjustment with PSM, IPTW, and overlap weighting.

**Figure S2.** Probability density distribution plot before and after adjustment with PSM, IPTW, and overlap weighting.

**Table S1.** Patient baseline characteristics in IPTW and overlap weighting adjusted cohorts.

**Table S2.** Exploratory outcomes in the IPTW and overlap weighting adjusted cohorts.

**Figure S1.** Distribution of standardized mean difference of variables before and after adjustment with PSM, IPTW, and overlap weighting. Abbreviations: ASPECT, Alberta Stroke Program Early CT; NIHSS, National Institutes of Health Stroke Scale; IPTW, inverse probability of treatment weighting; OW, overlap weighting; PSM, propensity score matching.

**
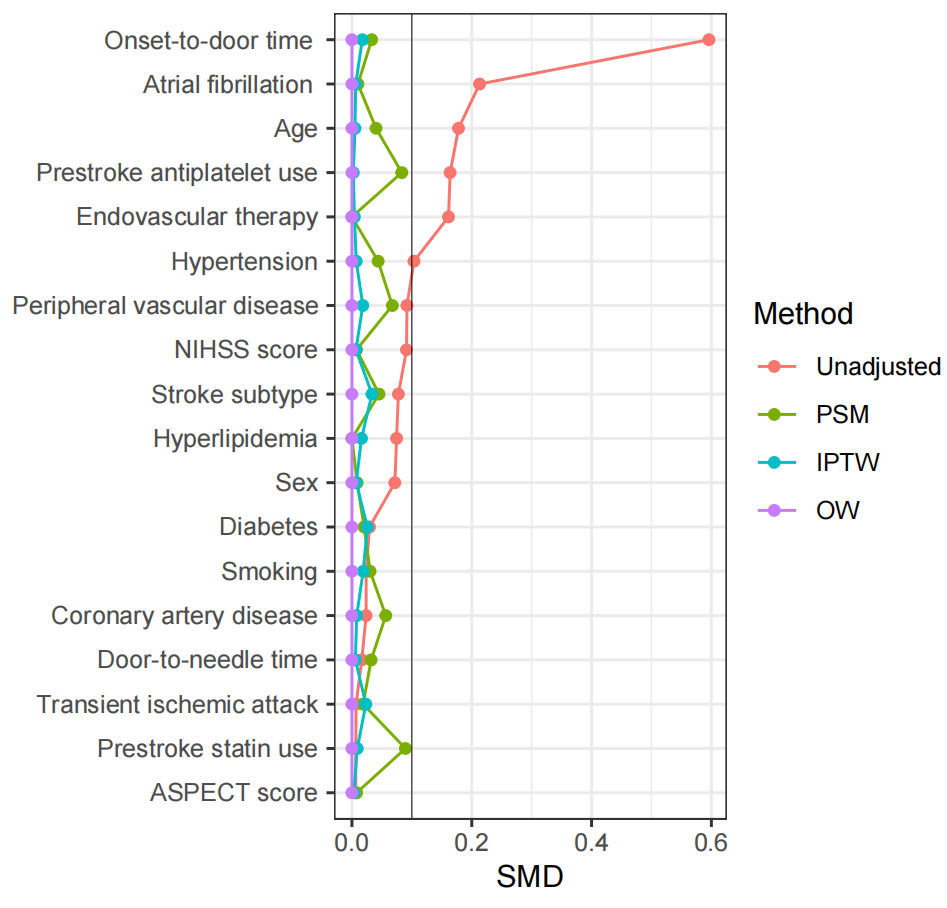
**

**Figure S2.** Probability density distribution plot before and after adjustment with PSM, IPTW, and overlap weighting. IPTW, inverse probability of treatment weighting; PSM, propensity score matching.

**
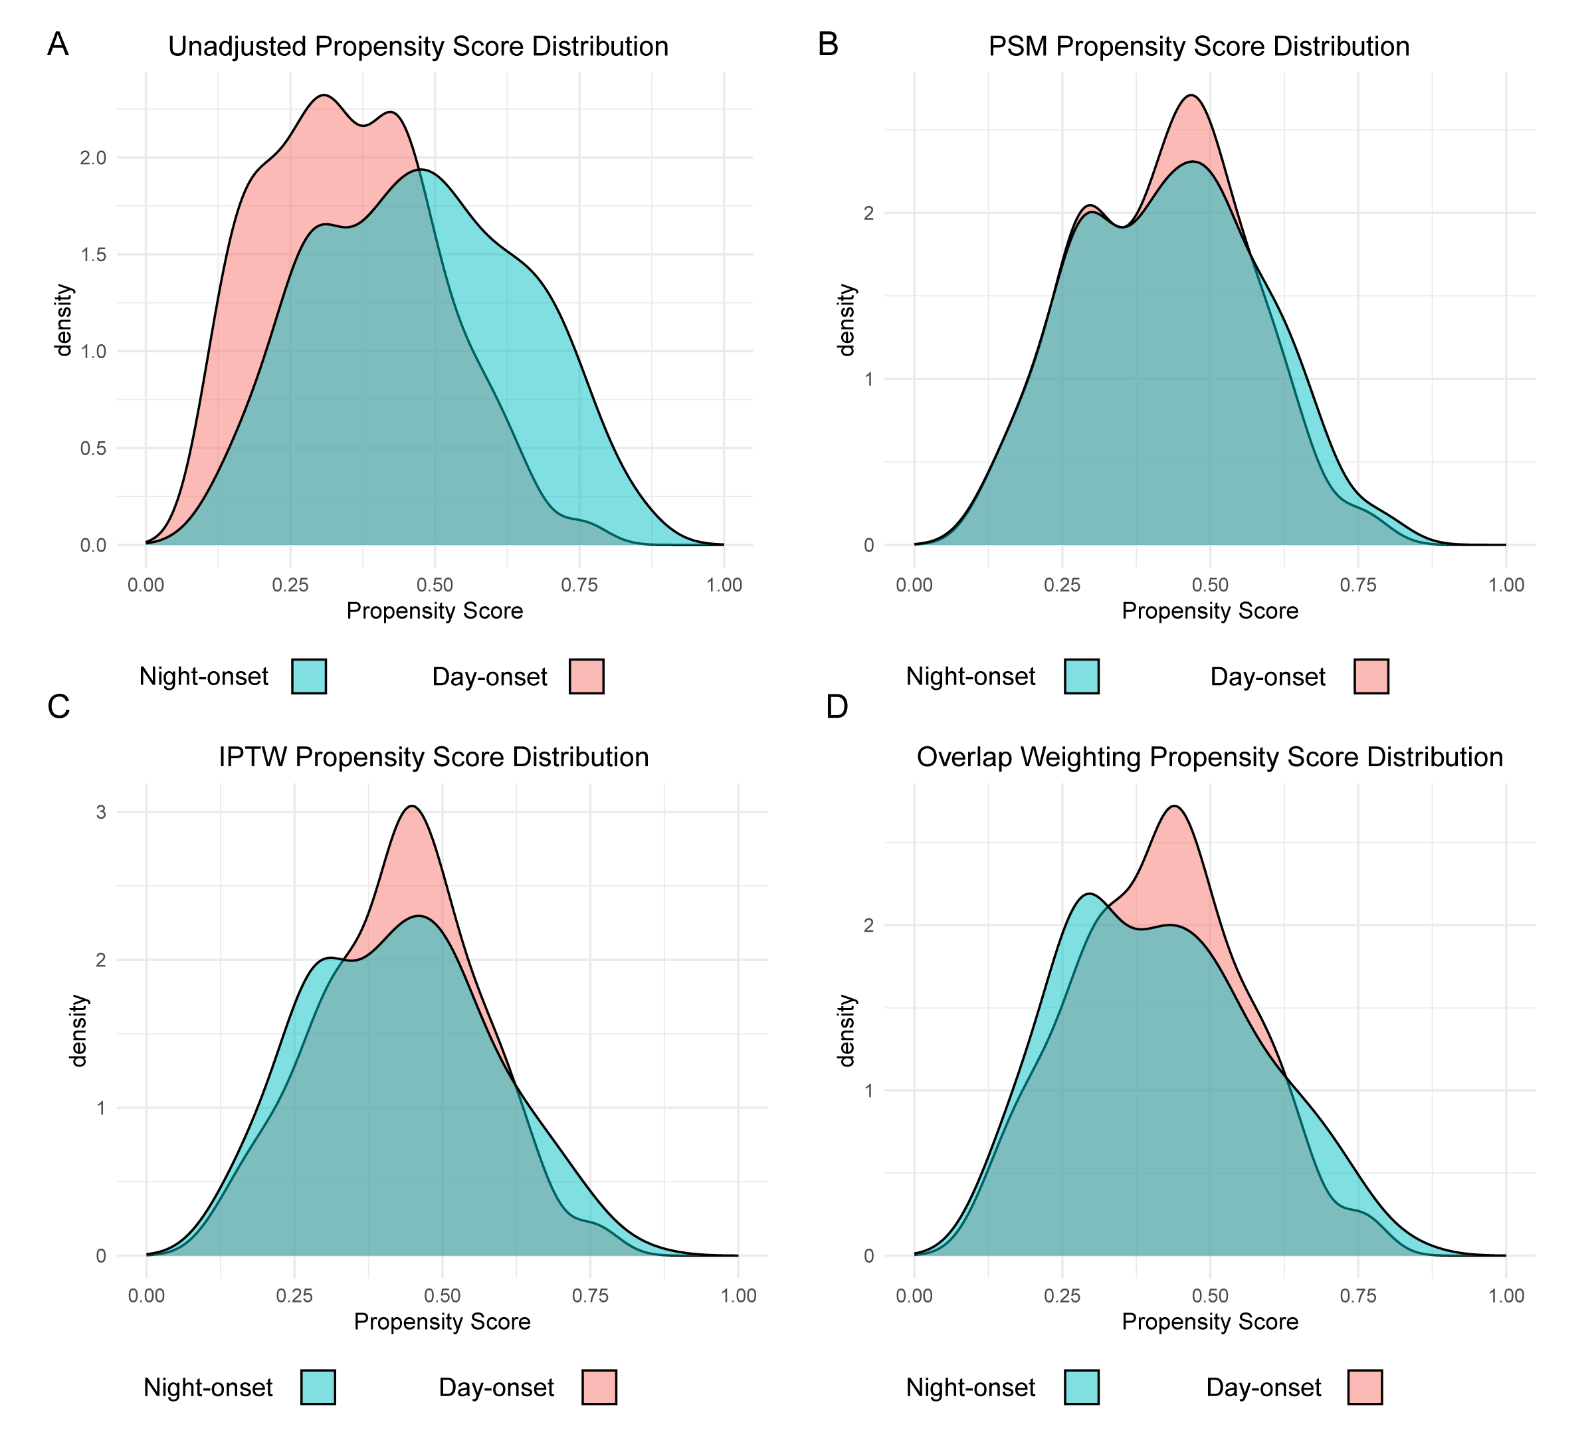
**

**Table S1.** Patient baseline characteristics in IPTW and overlap weighting adjusted cohorts. ASPECT: Alberta Stroke Program Early CT; CE, cardioembolism; IQR, interquartile range; LAA, large artery atherosclerosis; NIHSS, National Institutes of Health Stroke Scale; PSM, propensity score matching; SD, standard deviation; SMD, standardized mean difference; SVO, small vessel occlusion.

|  | **IPTW adjusted** | | **SMD** | **Overlap weighting adjusted** | | **SMD** |
| --- | --- | --- | --- | --- | --- | --- |
|  | **Night-onset (*n*=286)** | **Day-onset**  **(*n*=426)** | **Night-onset**  **(*n*=286)** | **Day-onset**  **(*n*=426)** |
| **Demographic** |  |  |  |  |  |  |
| Age, y | 69 (57, 76) | 69 (57, 75) | 0.005 | 69 (57, 76.4) | 69 (57, 76) | <0.001 |
| Sex |  |  | 0.007 |  |  | <0.001 |
| Female | 34 | 34 |  | 34 | 34 |  |
| Male | 66 | 66 |  | 66 | 66 |  |
| **Medical history** |  |  |  |  |  |  |
| Hypertension | 66 | 66 | 0.007 | 66 | 66 | <0.001 |
| Diabetes | 21 | 20 | 0.026 | 21 | 21 | <0.001 |
| Coronary artery disease | 9 | 9 | 0.008 | 8 | 8 | <0.001 |
| Peripheral vascular disease | 4 | 3 | 0.018 | 4 | 4 | <0.001 |
| Atrial fibrillation | 21 | 21 | 0.006 | 21 | 21 | <0.001 |
| Transient ischemic attack | 5 | 6 | 0.023 | 6 | 6 | <0.001 |
| Current smoking | 21 | 22 | 0.019 | 22 | 22 | <0.001 |
| Hyperlipidemia | 33 | 32 | 0.016 | 32 | 32 | <0.001 |
| Prestroke antiplatelet use | 30 | 30 | 0.002 | 29 | 29 | <0.001 |
| Prestroke statin use | 21 | 21 | 0.009 | 21 | 21 | <0.001 |
| Stroke subtype |  |  | 0.033 |  |  | <0.001 |
| LAA | 24 | 25 |  | 24 | 24 |  |
| CE | 15 | 14 |  | 14 | 14 |  |
| SVO | 30 | 31 |  | 30 | 30 |  |
| Other-determined | 6 | 6 |  | 6 | 6 |  |
| Undetermined | 26 | 25 |  | 25 | 25 |  |
| **Clinical characteristic** |  |  |  |  |  |  |
| Onset-to-door time, median, h | 2.1 (1.6, 2.6) | 2.0 (1.7, 2.5) | 0.017 | 2.2 (1.7, 2.7) | 2.1 (1.7, 2.6) | <0.001 |
| Door-to-needle time, min | 48 (42, 55) | 48 (42, 55) | 0.006 | 48 (42, 55) | 48 (42, 55) | <0.001 |
| NIHSS score, | 6.9 (2, 13) | 6 (2, 13) | 0.007 | 6.7 (2, 13) | 6 (2, 13) | <0.001 |
| ASPECT score | 9 (7, 10) | 9 (8, 10) | 0.003 | 9 (7, 10) | 9 (8, 10) | <0.001 |
| Endovascular thrombectomy | 15 | 15 | 0.004 | 15 | 15 | <0.001 |

**Table S2.** Exploratory outcomes in the IPTW and overlap weighting adjusted cohorts. **CI**, confidence interval; IPTW, inverse probability of treatment weighting; IQR, interquartile range.

|  | **IPTW adjusted,**  **Median (IQR)** | |  |  | **Overlap weighting adjusted,**  **Median (IQR)** | |  |  |
| --- | --- | --- | --- | --- | --- | --- | --- | --- |
|  | **Night-onset (*n*=286)** | **Day-onset**  **(*n*=426)** | **OR or difference (95% CI)** a | ***P*-value** | **Night-onset (*n*=286)** | **Day-onset (*n*=426)** | **OR or difference (95% CI)** a | ***P*-value** |
| Hemorrhagic transformation, No (%) | 13.2 | 11.3 | 1.20 (0.74−1.95) | 0.460 | 12.9 | 11.4 | 1.14 (0.71−1.85) | 0.575 |
| Collateral score | 16 (13−19) | 17 (14−19) | 0.00 (-0.03−0.02) | 0.699 | 16 (13−19) | 17 (14−19) | 0.00 (-0.03−0.02) | 0.763 |
| Core volume | 4 (1−18.9) | 3 (0−17) | 0.76 (0.57−0.95) | <0.001 | 4 (1−19.6) | 3.0 (0−17) | 0.76 (0.58−0.94) | <0.001 |
| Mismatch-ratio | 4.4 (0−12.5) | 4 (0−14) | 0.15 (-0.10−0.39) | 0.247 | 4.4 (0−12.6) | 4.1 (0−14) | 0.15 (-0.10−0.39) | 0.234 |
| Penumbra volumes | 48 (0−87) | 35 (0−83) | 0.13 (-0.13−0.40) | 0.334 | 48.0 (0−86.8) | 35.0 (0−83) | 0.08 (-0.19−0.35) | 0.547 |

a Difference is presented after Log10 transformation.
